# Supplementary material for: Proteasome inhibition preserves longitudinal growth of denervated muscle and prevents neonatal neuromuscular contractures
Source: JCI journal article supplement (doi:10.1172/jci.insight.128454), 2019-10-29
Supplement: sd1 [file 1]

## Supplementary Materials:

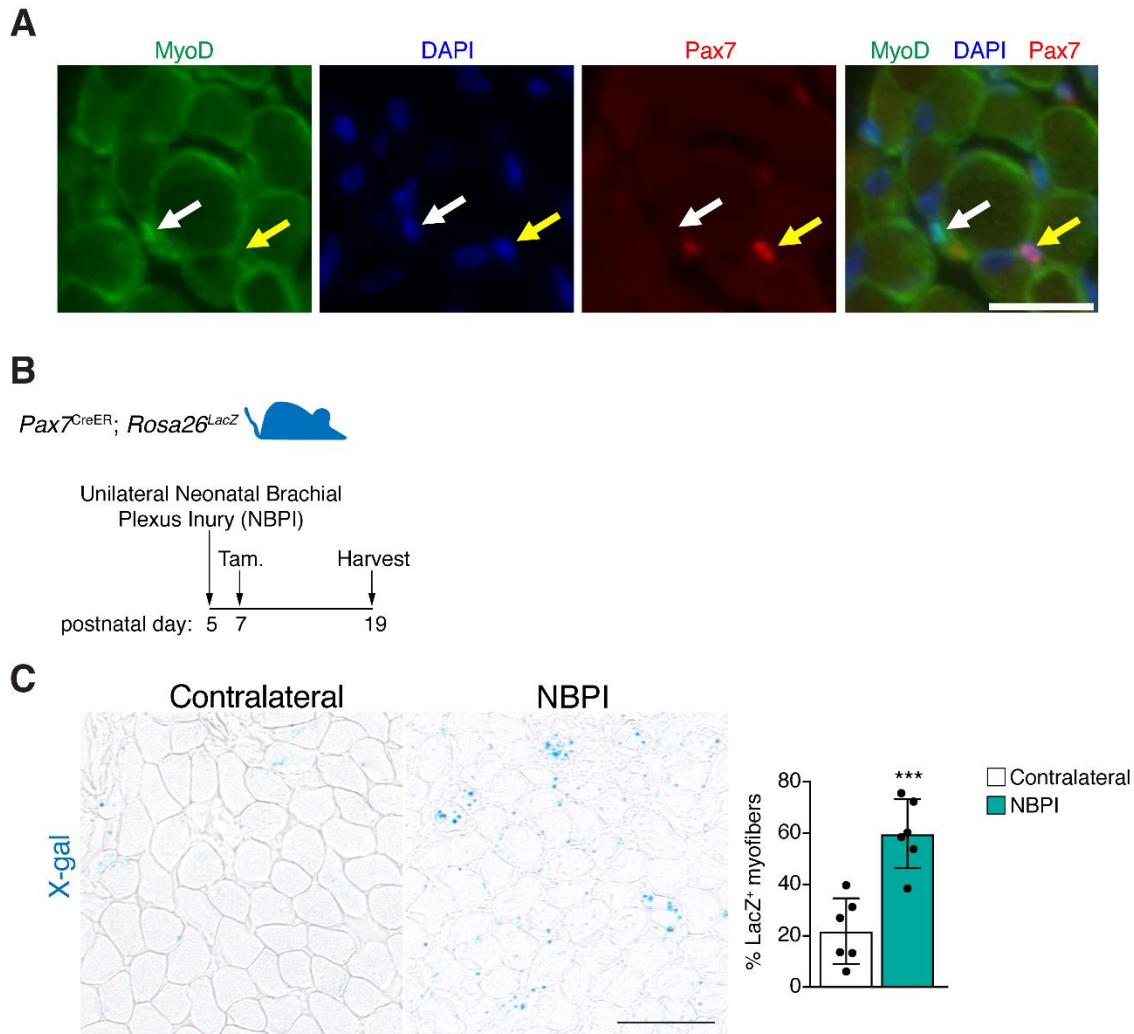

**Supplemental Figure 1. Assessment of myonuclear accretion after NBPI.** (A) Immunohistochemistry for MyoD and Pax7 in biceps 2 weeks after neonatal brachial plexus injury (NBPI). White arrows indicate a MyoD<sup>+</sup> Pax7<sup>-</sup> cell; yellow arrows indicate a MyoD<sup>-</sup> Pax7<sup>+</sup> cell. (B) Schematic showing use of *Pax7<sup>CreER</sup>; Rosa26<sup>LacZ</sup>* mice to label MuSCs at postnatal day 7 and track their incorporation into the myofiber. (C) Representative images (left) of X-gal stained contralateral and NBPI muscle. Quantification (right) of the percentage of LacZ<sup>+</sup> myofibers. Data are presented as mean  $\pm$  SD. Statistical analysis performed with a paired, two-tailed Student's *t*-test. \*\*\**P* < 0.001. Scale bar, 20  $\mu$ m in (A), 50  $\mu$ m in (C).

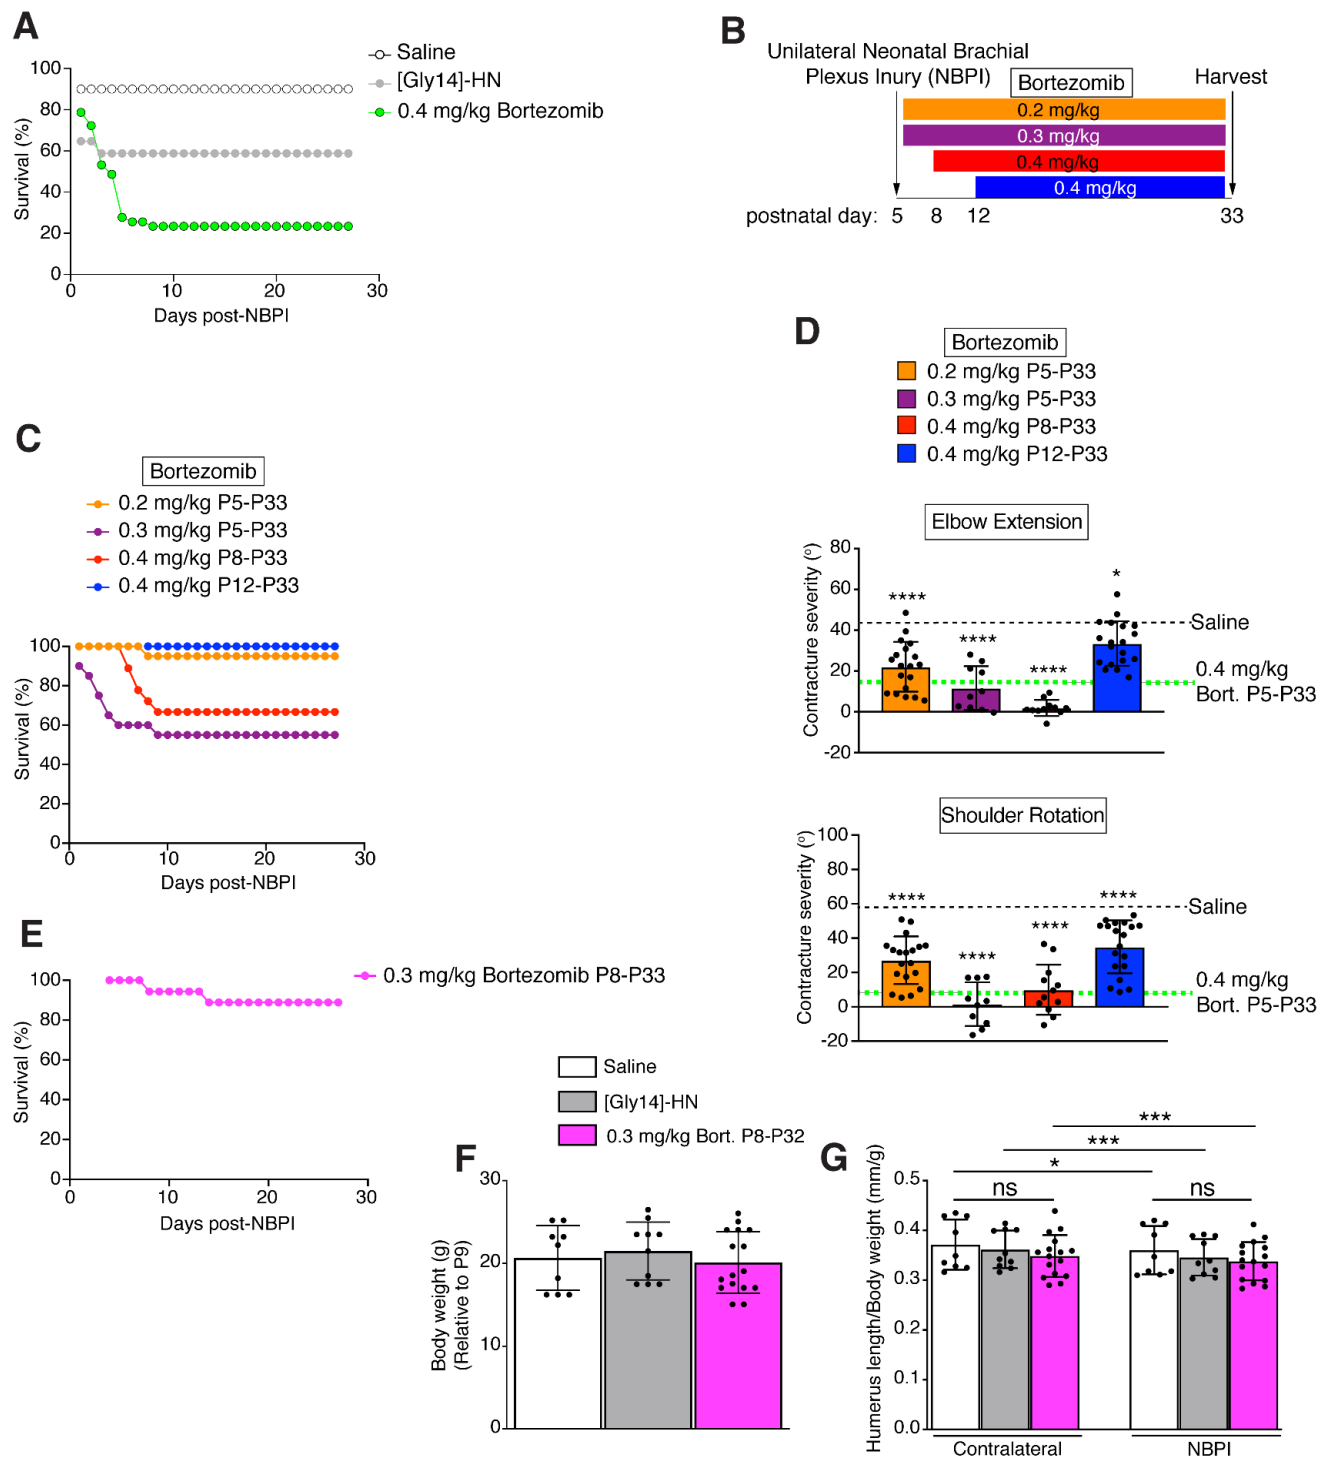

**Supplemental Figure 2. Optimization of bortezomib dose and timing.** (A) Survival of mice treated with saline, [Gly14]-HN, or 0.4 mg/kg bortezomib from P5-P33 (saline  $n = 9$ , [Gly14]-HN  $n = 10$ , 0.4 mg/kg bortezomib  $n = 11$ ). (B) Experimental scheme to vary the timing and dose of bortezomib. (C) Percent of

surviving mice during the various bortezomib treatment regimens. **(D)** Severity of elbow (top) and shoulder (bottom) contractures after NBPI and treatment with bortezomib. The black dotted line is the average contracture severity from saline-treated animals and green dotted line is the average contracture severity from mice treated with 0.4 mg/kg bortezomib from P5-P33 (from Fig. 4c). Sample sizes for (C, D) are 0.2 mg/kg P5-P33  $n = 19$ , 0.3 mg/kg P5-P33  $n = 10$ , 0.4 mg/kg P8-P33  $n = 12$ , 0.4 mg/kg P12-P33  $n = 19$ . **(E)** Survival curve for the mice treated with 0.3 mg/kg bortezomib from P8-P33 ( $n = 16$ ). **(F)** Body weight gain during treatment with saline, [Gly14]-HN, or 0.3 mg/kg bortezomib from P8-P33 (saline  $n = 9$ , [Gly14]-HN  $n = 10$ , 0.3 mg/kg bortezomib  $n = 16$ ). **(G)** Humerus length normalized to body weight after treatment with saline, [Gly14]-HN, or 0.3 mg/kg bortezomib P8-P33 (saline  $n = 9$ , [Gly14]-HN  $n = 10$ , 0.3 mg/kg bortezomib  $n = 16$ ), showing that humerus length is reduced by denervation but unaffected by bortezomib treatment. Data are presented as mean  $\pm$  SD. Statistical analyses were performed in (D) with unpaired, two-tailed Student's  $t$ -tests comparing each treatment group to saline controls (from Fig. 4C), except bortezomib 0.04 mg/kg P12-P33 where Mann-Whitney  $U$ -test was used due to non-normally distributed data; with Mann-Whitney  $U$ -test in (F) due to non-normally distributed data; and with unpaired, two-tailed Student's  $t$ -test between groups and paired, two-tailed Student's  $t$ -tests between limbs of mice in each group in (G), except in comparisons involving the saline groups where Mann Whitney  $U$ -test and Wilcoxon signed rank test were used, respectively, due to non-normally distributed data in the saline-treated mice. Bonferroni corrections for multiple comparisons were performed in (G), and adjusted p-values are reported for those data.  $*P < 0.05$ ,  $***P < 0.001$ ,  $****P < 0.0001$ .
